# Supplementary material
Source: Springer Nature journal article supplement (https://www.springermedizin.de/resource/supplementary/12883_2014_1052_MOESM5_ESM.pdf/9456438)

A

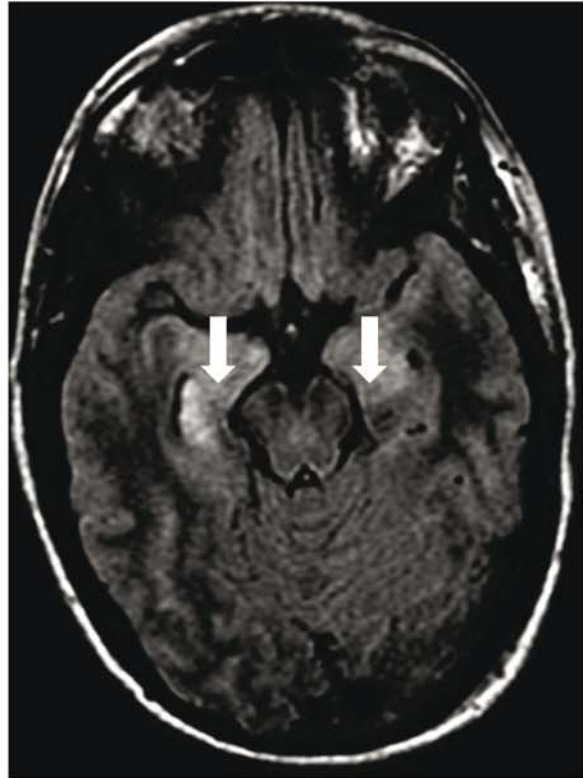

B

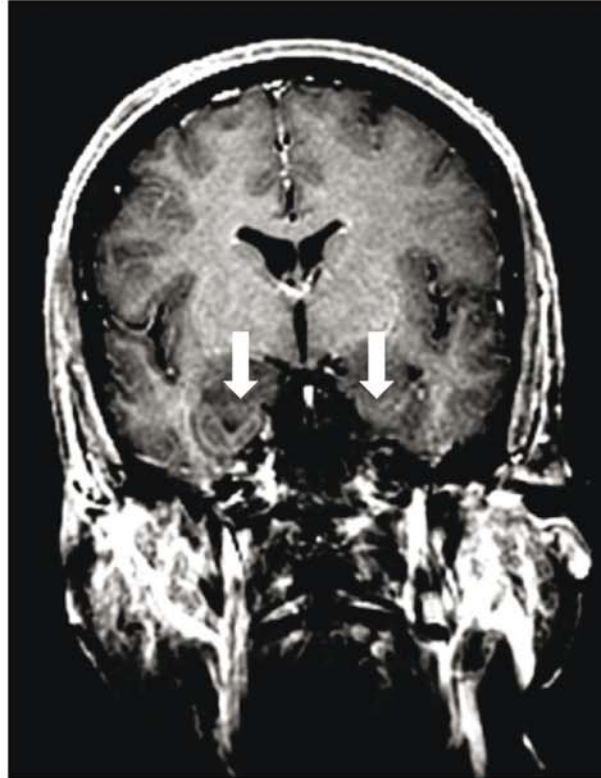

C

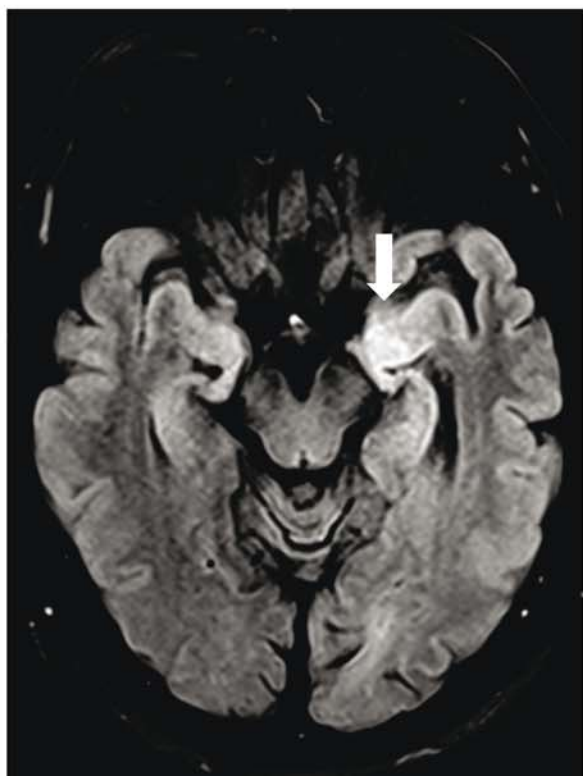

D

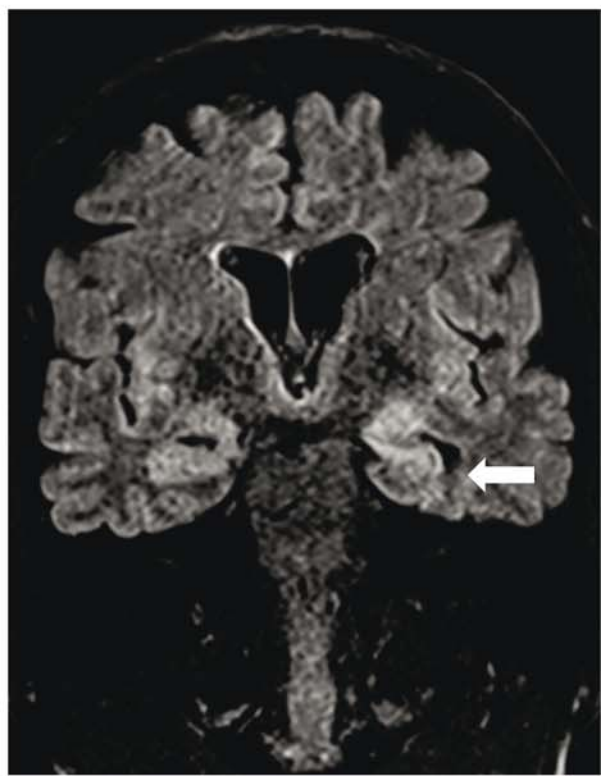

Supplement: MOESM5 [file 9456438]
